1 Larvae and adults exhibit contrasting patterns of immune gene expression and infection  
2 resistance in wild flour beetle populations

3 Ann T. Tate\*, Abby Perry, Derrick G. Jent

4 Department of Biological Sciences, Vanderbilt University, Nashville TN

5 \*Corresponding author email: [a.tate@vanderbilt.edu](mailto:a.tate@vanderbilt.edu)

6 Keywords: adaptive decoupling, life history evolution, ecological immunology, stage structure,  
7 *Tribolium*

8

9

## 10 **Abstract**

11 In nature, hosts face shifting patterns of parasite exposure and life history trade-offs as they  
12 develop from birth to old age. As a result, the net fitness benefit of immunological investment  
13 can change dramatically from one life stage to the next. Previous work has revealed a puzzling  
14 diversity of relative immune investment patterns among juvenile and adult stages, and it is not  
15 clear whether lessons learned from one particular population or species can be generalized to  
16 wild populations, after accounting for local adaptation and other variance-generating processes.  
17 In this study, we quantify larval and adult immune gene expression and resistance to bacterial  
18 infection in two flour beetle species (*Tribolium castaneum* and *T. confusum*) from two lab-  
19 adapted and five wild-derived populations. Our results provide a clear signal of higher infection-  
20 induced immunological investment and resistance in adults relative to larvae, despite variation  
21 among species in immune gene regulation. Better characterization of stage-specific investment in  
22 infection resistance in natural populations can inform our understanding of life history evolution  
23 and improve predictions of disease dynamics in the wild.

24

## 25 Introduction

26 The net contribution of different life history traits to host fitness changes across the ontogeny of  
27 the organism. While juveniles derive benefit from growing quickly to avoid predators and  
28 investing in survival to reach reproductive age, adults maximize fitness by finding mates and  
29 producing as many high-quality offspring as possible [1]. In many organisms, juveniles and  
30 adults also occupy different niches, such that traits beneficial in one life stage may not maximize  
31 fitness in another [2]. For organisms that undergo metamorphosis, such as holometabolous  
32 insects and amphibians, the dramatic reinvention of physiology can provide an opportunity to  
33 adaptively decouple juvenile and adult traits to better optimize fitness [3, 4] in stage-specific  
34 environments.

35 Even when life stages share a niche, juveniles and adults may face different hazards and trade-  
36 offs among life history traits [5, 6] that might favor trait divergence over evolutionary time. For  
37 example, juveniles may feed at different rates or from a different distribution of resources than  
38 adults, altering patterns of exposure to parasites, pathogens, and symbionts over host age [7-9].  
39 Investing in immunological resistance to those parasites, however, can tax resource allocation to  
40 traits like growth and reproduction [6], contributing to asymmetry in the net cost of immunity to  
41 host fitness across different life stages [10].

42 Collectively, previous research on infection susceptibility and immunity in holometabolous  
43 insects defies neat conclusions about relative immune investment across ontogeny. In honeybee  
44 workers (*Apis mellifera*), for example, the activity of the melanization enzyme phenoloxidase  
45 increases steadily over development from larva to adult [11], while in the tobacco hornworm  
46 (*Manduca sexta*), melanization activity peaks in the larval stage and declines thereafter [12] (see  
47 [13] for further examples). Most studies, however, employ insect populations reared in (and  
48 evolving under) lab conditions, sometimes for substantial periods of time. After accounting for  
49 the effects of local adaptation, can we still discern generalizable principles of stage-structured  
50 immunological investment?

51 To address this question, we turned to wild and lab-derived populations of flour beetles  
52 (*Tribolium castaneum* and *T. confusum*). Previous research in lab-reared *T. castaneum* has  
53 suggested that the regulation of immune [13] and cuticular [14] gene expression differs among  
54 life stages in uninfected individuals, while, in larvae specifically, different populations of both  
55 species exhibit natural variation in immune gene expression and resistance to bacterial infection  
56 [15]. To test whether immune gene expression and infection resistance in these populations  
57 differs among life stages, we injected larvae and adults from seven populations (four *T.*  
58 *castaneum*, three *T. confusum*) with one of four increasing doses of the entomopathogenic  
59 bacterium *Bacillus thuringiensis* (Bt) or sterile media as a wounding control. We quantified  
60 relative bacterial load and host expression of several immune genes, including the antimicrobial  
61 peptides *defensin-1* and *attacin-1*, the recognition protein *pgrp-sc2*, and the melanization enzyme  
62 *ddc*, during the acute phase of infection. Our results highlight the importance of life stage for

63 predicting disease susceptibility and underscore the complex relationships between development,  
64 phylogeny, and ecology in life history evolution.

65

## 66 **Methods**

### 67 *Experimental Design*

68 The initial collection of wild beetle populations and analysis of variation in immune gene  
69 expression among larvae from these populations has been described in detail in [15]. The current  
70 study compares these larval data (available from Data Dryad [16]) to data from adults processed  
71 at the same time (data available i). Briefly, we created breeding groups of 18 adult beetles (~9  
72 male and 9 female) from two lab stock colonies (Snively *T. confusum* and Snively *T.*  
73 *castaneum*) and five wild-derived, parasite-free stock colonies (Green River *T. castaneum*, Green  
74 River *T. confusum*, Marshall *T. confusum*, Dorris *T. castaneum*, WF Ware *T. castaneum*).  
75 Breeding groups were allowed to lay eggs in whole wheat flour before being passaged to new  
76 flour every 48 hours. The adult cohorts from this experiment were derived from the second  
77 egg-lay, while the larvae were derived from the ninth egg-lay. We have previously determined that  
78 egg-laying order within the first few weeks minimally affects Bt resistance traits in flour beetles  
79 [17]. Individuals from the different breeding groups were randomly assigned to different initial  
80 doses immediately before infection. We kept track of sex for a subset of the adults (N = 45)  
81 derived from the Dorris, Green River, and WF Ware *T. castaneum* populations to determine  
82 whether adult sex could account for variation in gene expression. As preliminary analyses did  
83 not find a strong effect, however, and not all adults (or any of the larvae) were classified by sex,  
84 we dropped this variable from subsequent analyses.

85 An overnight culture of *Bacillus thuringiensis* Berliner (ATCC 55177) was prepared from a  
86 glycerol stock and grown at 30°C in Nutrient Broth #3 (NB, Sigma Aldrich). An aliquot of  
87 overnight culture was brought to an OD of 0.5 in fresh NB, and initial doses were created by  
88 mixing 500uL overnight culture with 500uL log phase culture (~1\*10<sup>8</sup> CFU/mL) and then  
89 serially diluting aliquots with sterile NB to create the desired two-fold dilution. The second-  
90 highest dose is the larval LD50.

91 When the larval cohorts reached approximately 4mm in length (about 3 days before the onset of  
92 pupation), we injected both larvae and unmated adults (approximately 7 days post eclosion) with  
93 either sterile NB or one of four two-fold increasing doses of Bt (N = 6-8 individuals per dose per  
94 stage per population), using a micropin dipped in the relevant solution. All injected beetles were  
95 sacrificed at 8 hours post injection by flash freezing, and stored at -80°C. We extracted RNA,  
96 created cDNA, and quantified gene expression via RT-qPCR as previously described [15] using  
97 degenerate primers capable of amplifying transcripts from both flour beetle species with equal  
98 efficiency for four immune genes: *attacin-1*, *defensin-1*, *pgrp-sc2*, and *ddc*. In addition, we  
99 quantified the expression of host reference gene *rps18* and a fragment of the Bt 16s gene that has

100 been previously validated as a proxy for bacterial CFU [17]. We calculated  $\Delta C_t$  values (target  
101 gene  $C_t$  – reference gene  $C_t$ ) for each gene template for each individual. These values were  
102 linearized ( $2^{-\Delta C_t}$ ) prior to analysis and then log-transformed for normality, as in [18, 19].

### 103 ***Statistical Analysis***

104 To analyze the effect of life stage on resistance at 8 hours post infection, we employed linear  
105 mixed models of the form: relative bacterial load ~ life stage + initial dose + (1|population),  
106 where stage and dose are main effects and population is treated as a random effect in the model.  
107 To investigate whether life stage affects the magnitude of inducible immunity to a wounding  
108 event or infection, we analyzed the relative magnitude of gene expression at eight hours post  
109 exposure. For each analyzed gene, the linear mixed model took the form of: gene expression ~  
110 stage + (1|population) for the sterile stabs and gene expression ~ stage + log<sub>2</sub>(bacterial load) +  
111 (1|population) for the infected individuals. Species was added as an additional fixed effect if it  
112 significantly improved model fit, as determined by a log likelihood ratio test.

113 Because p-values cannot be reliably calculated for mixed models, we instead rely on confidence  
114 intervals (2.5%, 97.5%) to determine significance, where a lack of overlap with 0 encourages the  
115 rejection of the null hypothesis. All statistical analyses were conducted using the lmer function  
116 from the lme4 package in R (v.4.0.3).

117

## 118 **Results**

### 119 ***Impact of life stage on resistance and immune gene expression***

120 Both initial dose and life stage significantly predicted relative bacterial load at 8 hours post  
121 infection (**Table 1**). The bacterial load increased with initial dose, and larval bacterial load was  
122 about 1.5 times greater than adult bacterial load at 8 hours post infection (**Fig. 1**).

123 After injection with sterile media, life stage did not significantly predict expression of any gene  
124 (**Table 1**). The expression of *defensin-1* by different life stages across populations is depicted in  
125 **Fig. 2A**. While model selection did not generally favor the inclusion of species for most genes,  
126 the effect of species on *attacin-1* was significant, with *T. confusum* exhibiting higher expression  
127 than *T. castaneum*.

128 At 8 hours post injection with live bacteria, adults exhibited significantly higher expression of all  
129 immune genes (**Table 2**), which was relatively consistent across populations (**Fig. 2B**). The  
130 antimicrobial peptide *defensin-1* exhibited the biggest effect size between stages after accounting  
131 for variance among populations (**Fig. 2C**). As expected, the main effect of relative bacterial load  
132 on expression was significant for all genes. The main effect of species was significant for  
133 *defensin-1* and *ddc* only, where *T. confusum* exhibited lower expression of both genes relative to  
134 *T. castaneum* (**Fig. 2C**).

## 135 Discussion

136 Theory predicts that evolutionarily optimal levels of juvenile investment in immunological  
137 resistance depend on the precise magnitude of life history parameters like life span and juvenile  
138 background mortality rate [10], while changes in parasite exposure across stages likely also  
139 contribute to ontogenetic variation in immunological investment [20]. Since natural populations  
140 may experience very different selective pressures from parasites, predators, and other ecological  
141 factors that influence these parameters, it is difficult to predict *a priori* whether decoupling of  
142 immunological traits across life stages will show consistent patterns in the wild. Our results  
143 provide a clear signal of life stage-specific variation in resistance-associated traits to a particular  
144 infection: adult flour beetles invest more in the inducible expression of all assayed immune genes  
145 and reap a modest but detectable benefit with regard to resisting bacterial proliferation.

146 Is the observed stage-specific variation actually adaptive, in the sense that it maximizes the  
147 fitness of an individual by independently optimizing the response in each life stage, or could it  
148 simply reflect a developmental constraint on the deployment of the larval immune response? The  
149 dominance of the adult response to infection does not appear to extend to the wounding response,  
150 as any differences in gene expression among life stages appear to be population-specific and  
151 exhibit no consistent trend (e.g. Fig. 2A). Thus, there does not appear to be any fundamental  
152 developmental constraint manifest in the baseline inducible response. In the absence of studies  
153 that manipulate the expression of key genes independently in each life stage and measure  
154 associated fitness effects, however, it is difficult to obtain a direct answer about the relative roles  
155 of adaptation and constraint in ontogenetic decoupling of immunological phenotypes.

156 When evaluating the potential role of local adaptation in structuring immunological variation  
157 across stages, it is interesting to consider differences in variance structure among populations and  
158 species [21, 22]. In our study, all four populations of *T. castaneum* tell a similar story with regard  
159 to infection-induced expression of *defensin-1*: expression depends on bacterial load, and adults  
160 exhibit higher expression levels (Fig. 2C). The expression of *defensin-1* in *T. confusum* appears  
161 to be under different regulatory control since it does not depend neatly on bacterial density, but  
162 even here adults express these genes at higher levels. These two species diverged as long as 60  
163 million years ago [23] and occupied different continents, but re-converged at the dawn of  
164 domestication to specialize on agricultural products; they even co-occur in some locations  
165 (including two in this study). Whether ontogenetic decoupling of immunity is ancestral to these  
166 beetles, or whether it arose more recently as ecological conditions converged, remains an  
167 interesting question for future study in this and other host taxa.

168 In addition to the implications of ontogenetic decoupling for immune system evolution, variation  
169 in resistance among life stages can influence disease dynamics in stage-structured host  
170 populations. If less resistant juvenile stages are more competent at transmitting microbes, for  
171 example, populations that skew toward more susceptible stages could drive up the force of  
172 infection [24, 25]. If, on the other hand, adult investment in immunity trades off with

173 reproduction [26], then a decrease in the birth of new susceptibles could drive down disease  
174 prevalence even further than the effect of adult resistance alone. The relative consistency of life  
175 stage differences in immunological resistance among populations in our study lends support to  
176 the general applicability of stage-structured models parameterized to reflect immunological  
177 asymmetry.

178 In summary, our study provides evidence of stage-structured variation in immune responses  
179 across natural populations and species. These observations raise the question of whether these  
180 differences evolved adaptively against stage-specific parasite pressures, or whether life history  
181 trade-offs or developmental constraints dominate the optimization of immune system investment.  
182 Future work investigating the mechanistic basis of immune system regulation across host  
183 development and in response to the natural parasite milieu encountered by each life stage could  
184 help to disentangle the ecological and evolutionary contributors to ontogenetic decoupling of  
185 immune responses.

## 186 **Acknowledgements**

187 This work was supported in part by NSF DEB grant no. 1753982 to A.T.T.

## 188 **Author Contributions**

189 A.T.T. conceived and designed the study and experiments. A.P. and D.J. conducted the  
190 experiments. A.T.T. and A.P. analyzed the data. A.T.T. wrote the manuscript.

## 191 **Data Accessibility**

192 Larval gene expression data can be accessed in Data Dryad [16]. Adult gene expression data can  
193 be accessed in the supplemental material.

## 194 **References**

- 195 [1] Moran, N.A. 1994 Adaptation and constraint in the complex life cycles of animals. *Annual*  
196 *Review of Ecology and Systematics* **25**, 573-600.
- 197 [2] Brown, L.D., Shapiro, L.L.M., Thompson, G.A., Estévez-Lao, T.Y. & Hillyer, J.F. 2019  
198 Transstadial immune activation in a mosquito: Adults that emerge from infected larvae have  
199 stronger antibacterial activity in their hemocoel yet increased susceptibility to malaria infection.  
200 *Ecology and Evolution* **9**, 6082-6095. (doi:10.1002/ece3.5192).
- 201 [3] Goedert, D. & Calsbeek, R. 2019 Experimental Evidence That Metamorphosis Alleviates  
202 Genomic Conflict. *The American Naturalist* **194**, 356-366. (doi:10.1086/704183).
- 203 [4] Fellous, S. & Lazzaro, B.P. 2011 Potential for evolutionary coupling and decoupling of larval  
204 and adult immune gene expression. *Molecular Ecology* **20**, 1558-1567. (doi:10.1111/j.1365-  
205 294X.2011.05006.x).
- 206 [5] Kirschman, L.J., Crespi, E.J. & Warne, R.W. 2018 Critical disease windows shaped by stress  
207 exposure alter allocation trade-offs between development and immunity. *Journal of Animal*  
208 *Ecology* **87**, 235-246. (doi:10.1111/1365-2656.12778).

- 209 [6] Gupta, V., Frank, A., Matolka, N. & Lazzaro, B. 2021 Reliance on polyfunctional tissue  
210 leads to a reproduction-immunity tradeoff due to inherent constraint. *bioRxiv*,  
211 2021.2001.2028.428655. (doi:10.1101/2021.01.28.428655).
- 212 [7] Combrink, L., Glidden, C.K., Beechler, B.R., Charleston, B., Koehler, A.V., Sisson, D.,  
213 Gasser, R.B., Jabbar, A. & Jolles, A.E. 2020 Age of first infection across a range of parasite taxa  
214 in a wild mammalian population. *Biology Letters* **16**, 20190811. (doi:10.1098/rsbl.2019.0811).
- 215 [8] Clark, J., McNally, L. & Little, T.J. 2020 Pathogen Dynamics across the Diversity of Aging.  
216 *The American Naturalist* **197**, 203-215. (doi:10.1086/712380).
- 217 [9] Hammer, T.J. & Moran, N.A. 2019 Links between metamorphosis and symbiosis in  
218 holometabolous insects. *Philosophical Transactions of the Royal Society B: Biological Sciences*  
219 **374**, 20190068. (doi:10.1098/rstb.2019.0068).
- 220 [10] Ashby, B. & Bruns, E. 2018 The evolution of juvenile susceptibility to infectious disease.  
221 *Proceedings of the Royal Society B: Biological Sciences* **285**. (doi:10.1098/rspb.2018.0844).
- 222 [11] Laughton, A.M., Boots, M. & Siva-Jothy, M.T. 2011 The ontogeny of immunity in the  
223 honey bee, *Apis mellifera* L. following an immune challenge. *Journal of Insect Physiology* **57**,  
224 1023-1032. (doi:https://doi.org/10.1016/j.jinsphys.2011.04.020).
- 225 [12] Trauer, U. & Hilker, M. 2013 Parental Legacy in Insects: Variation of Transgenerational  
226 Immune Priming during Offspring Development. *PloS One* **8**, e63392.
- 227 [13] Critchlow, J.T., Norris, A. & Tate, A.T. 2019 The legacy of larval infection on  
228 immunological dynamics over metamorphosis. *Philosophical Transactions of the Royal Society*  
229 *B: Biological Sciences* **374**, 20190066.
- 230 [14] Parthasarathy, R. & Palli, S.R. 2008 Proliferation and differentiation of intestinal stem cells  
231 during metamorphosis of the red flour beetle, *Tribolium castaneum*. *Developmental Dynamics*  
232 **237**, 893-908. (doi:10.1002/dvdy.21475).
- 233 [15] Jent, D., Perry, A., Critchlow, J. & Tate, A.T. 2019 Natural variation in the contribution of  
234 microbial density to inducible immune dynamics. *Molecular Ecology* **28**, 5360-5372.  
235 (doi:10.1111/mec.15293).
- 236 [16] Tate, A., Jent, D., Perry, A. & Critchlow, J. 2019 Data From: Natural variation in the  
237 contribution of microbial density to inducible immune dynamics. In *Data Dryad*.  
238 <https://doi.org/10.5061/dryad.dbrv15dx3>
- 239 [17] Tate, A.T. & Graham, A.L. 2015 Trans-generational priming of resistance in wild flour  
240 beetles reflects the primed phenotypes of laboratory populations and is inhibited by co-infection  
241 with a common parasite. *Functional Ecology* **29**, 1059-1069. (doi:10.1111/1365-2435.12411).
- 242 [18] Tate, A.T., Andolfatto, P., Demuth, J.P. & Graham, A.L. 2017 The within-host dynamics of  
243 infection in trans-generationally primed flour beetles. *Molecular Ecology* **26**, 3794-3807.  
244 (doi:10.1111/mec.14088).
- 245 [19] Tate, A.T. & Graham, A.L. 2017 Dissecting the contributions of time and microbe density  
246 to variation in immune gene expression. *Proceedings of the Royal Society B: Biological Sciences*  
247 **284**. (doi:10.1098/rspb.2017.0727).
- 248 [20] Tate, A.T. & Graham, A.L. 2015 Dynamic Patterns of Parasitism and Immunity across Host  
249 Development Influence Optimal Strategies of Resource Allocation. *The American Naturalist*  
250 **186**, 495-512. (doi:10.1086/682705).
- 251 [21] Kaunisto, K.M. & Suhonen, J. 2012 Parasite burden and the insect immune response:  
252 interpopulation comparison. *Parasitology* **140**, 87-94. (doi:10.1017/S0031182012001369).
- 253 [22] Béréanos, C., Schmid-Hempel, P. & Wegner, K.M. 2012 Complex adaptive responses during  
254 antagonistic coevolution between *Tribolium castaneum* and its natural parasite *Nosema whitei*



255 revealed by multiple fitness components. *BMC Evolutionary Biology* **12**, 11. (doi:10.1186/1471-  
256 2148-12-11).

257 [23] Angelini, D.R. & Jockusch, E.L. 2008 Relationships among pest flour beetles of the genus  
258 *Tribolium* (Tenebrionidae) inferred from multiple molecular markers. *Molecular phylogenetics*  
259 *and evolution* **46**, 127-141. (doi:10.1016/j.ympev.2007.08.017).

260 [24] Dwyer, G. 1991 The Roles of Density, Stage, and Patchiness in the Transmission of an  
261 Insect Virus. *Ecology* **72**, 559-574. (doi:10.2307/2937196).

262 [25] Tate, A.T. & Rudolf, V.H.W. 2012 Impact of life stage specific immune priming on  
263 invertebrate disease dynamics. *Oikos* **121**, 1083-1092. (doi:10.1111/j.1600-0706.2011.19725.x).

264 [26] Khan, I., Prakash, A. & Agashe, D. 2019 Pathogen susceptibility and fitness costs explain  
265 variation in immune priming across natural populations of flour beetles. *Journal of Animal*  
266 *Ecology* **88**, 1332-1342. (doi:10.1111/1365-2656.13030).

267

268

269 **Tables**

**Table 1. The effect of life stage on bacterial load at 8 hours post injection**

|              | Estimate | Std. Error | t value | 2.5CI        | 97.5CI       |
|--------------|----------|------------|---------|--------------|--------------|
| Intercept    | -14.73   | 0.66       | -22.18  | -16.06       | -13.40       |
| Initial dose | 0.86     | 0.09       | 9.33    | <b>0.68</b>  | <b>1.04</b>  |
| Stage        | -0.62    | 0.20       | -3.05   | <b>-1.02</b> | <b>-0.22</b> |

Notes: Model is  $\log_2(\text{bacterial load}) \sim \text{dose} + \text{stage} + (1|\text{pop})$ . Larvae are the baseline stage. Adding species as a factor did not improve model fit (as determined by log likelihood ratio test) and was excluded from the model. Bold confidence intervals indicate lack of overlap with null expectation.

270

**Table 2. The effect of life stage on immune gene expression at 8 hours post injection with sterile saline or Bt**

|                              | Estimate | Std. error | t value | 2.5CI        | 97.5CI       |
|------------------------------|----------|------------|---------|--------------|--------------|
| <i>Attacin-1 (sterile)</i>   |          |            |         |              |              |
| Intercept                    | -13.33   | 0.48       | -27.98  | -14.37       | -12.28       |
| Stage                        | -0.07    | 0.38       | -0.20   | -0.82        | 0.68         |
| Species                      | 1.57     | 0.67       | 2.35    | <b>0.03</b>  | <b>3.07</b>  |
| <i>Defensin-1 (sterile)</i>  |          |            |         |              |              |
| Intercept                    | -10.75   | 0.38       | -28.01  | -11.58       | -9.91        |
| Stage                        | 0.61     | 0.35       | 1.75    | -0.08        | 1.32         |
| <i>Pgrp-sc2 (sterile)</i>    |          |            |         |              |              |
| Intercept                    | -11.62   | 0.65       | -17.76  | -13.09       | -10.15       |
| Stage                        | 0.37     | 0.23       | 1.63    | -0.08        | 0.82         |
| <i>Ddc (sterile)</i>         |          |            |         |              |              |
| Intercept                    | -11.44   | 0.20       | -57.38  | -11.84       | -11.01       |
| Stage                        | 0.56     | 0.27       | 2.06    | -0.02        | 1.11         |
| <i>Attacin-1 (infected)</i>  |          |            |         |              |              |
| Intercept                    | -6.51    | 0.73       | -8.92   | -7.87        | -5.15        |
| Bt load                      | 0.34     | 0.04       | 7.68    | <b>0.26</b>  | <b>0.43</b>  |
| Stage                        | 0.81     | 0.17       | 4.86    | <b>0.48</b>  | <b>1.13</b>  |
| Species                      | -0.60    | 0.81       | -0.74   | -2.14        | 0.94         |
| <i>Defensin-1 (infected)</i> |          |            |         |              |              |
| Intercept                    | -7.00    | 0.85       | -8.27   | -8.59        | -5.41        |
| Bt load                      | 0.17     | 0.06       | 2.77    | <b>0.05</b>  | <b>0.29</b>  |
| Stage                        | 1.28     | 0.24       | 5.33    | <b>0.80</b>  | <b>1.74</b>  |
| Species                      | -2.40    | 0.70       | -3.42   | <b>-3.73</b> | <b>-1.06</b> |
| <i>Pgrp-sc2 (infected)</i>   |          |            |         |              |              |
| Intercept                    | -8.73    | 0.92       | -9.45   | -10.69       | -6.72        |
| Bt load                      | 0.14     | 0.04       | 3.51    | <b>0.06</b>  | <b>0.22</b>  |
| Stage                        | 0.38     | 0.15       | 2.57    | <b>0.09</b>  | <b>0.67</b>  |
| Species                      | -0.40    | 1.24       | -0.32   | -3.19        | 2.40         |
| <i>Ddc (infected)</i>        |          |            |         |              |              |
| Intercept                    | -6.60    | 0.47       | -14.15  | -7.53        | -5.61        |
| Bt load                      | 0.30     | 0.04       | 8.04    | <b>0.22</b>  | <b>0.37</b>  |
| Stage                        | 0.55     | 0.14       | 3.80    | <b>0.26</b>  | <b>0.83</b>  |
| Species                      | -1.28    | 0.31       | -4.07   | <b>-1.97</b> | <b>-0.55</b> |

Notes: Linear mixed models (using maximum likelihood method) are of the general structure: gene expression ~ log<sub>2</sub>(Bt load) + stage + (1|pop). Model selection was conducted with a log likelihood ratio test to determine inclusion of species as an additional fixed effect. For infected analyses, all genes either had no difference among models with and without species, or were improved with the inclusion of species, so species was retained for all. Bold confidence intervals indicate lack of overlap null expectation.

272 **Figures**

273 **Figure 1.** The impact of life stage on bacterial load in seven flour beetle populations. Larvae  
274 (blue) and adults (orange) were infected with one of four two-fold increasing doses (1,2,4,8) and  
275 sacrificed at 8 hours post infection. Bacterial load was estimated via RT-qPCR relative to host  
276 reference gene expression. Shapes reflect initial dose. Cast = *T. castaneum*, conf = *T. confusum*.

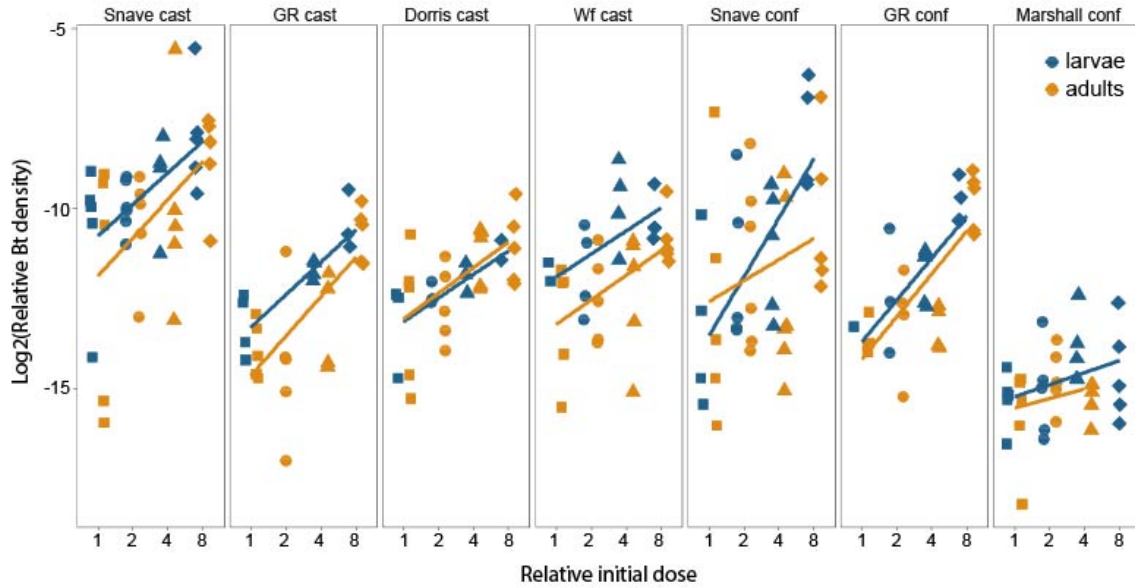

277

278

279

280 **Figure 2.** The impact of life stage on inducible expression of the antimicrobial peptide *defensin-*  
281 *I* in seven flour beetle populations. Larvae (blue) and adults (orange) were treated with either a  
282 sterile media jab (A.) or infected with one of four two-fold increasing doses (B) and sacrificed at  
283 8 hours post infection. *Defensin-1* expression and bacterial load were estimated via RT-qPCR  
284 relative to host reference gene expression; aggregated infection-induced expression data by  
285 species is visualized in (C). Shapes in (B, C) reflect initial dose while log<sub>2</sub>(relative Bt density)  
286 represents relative bacterial density at 8 hours. Cast = *T. castaneum*, conf = *T. confusum*.

287

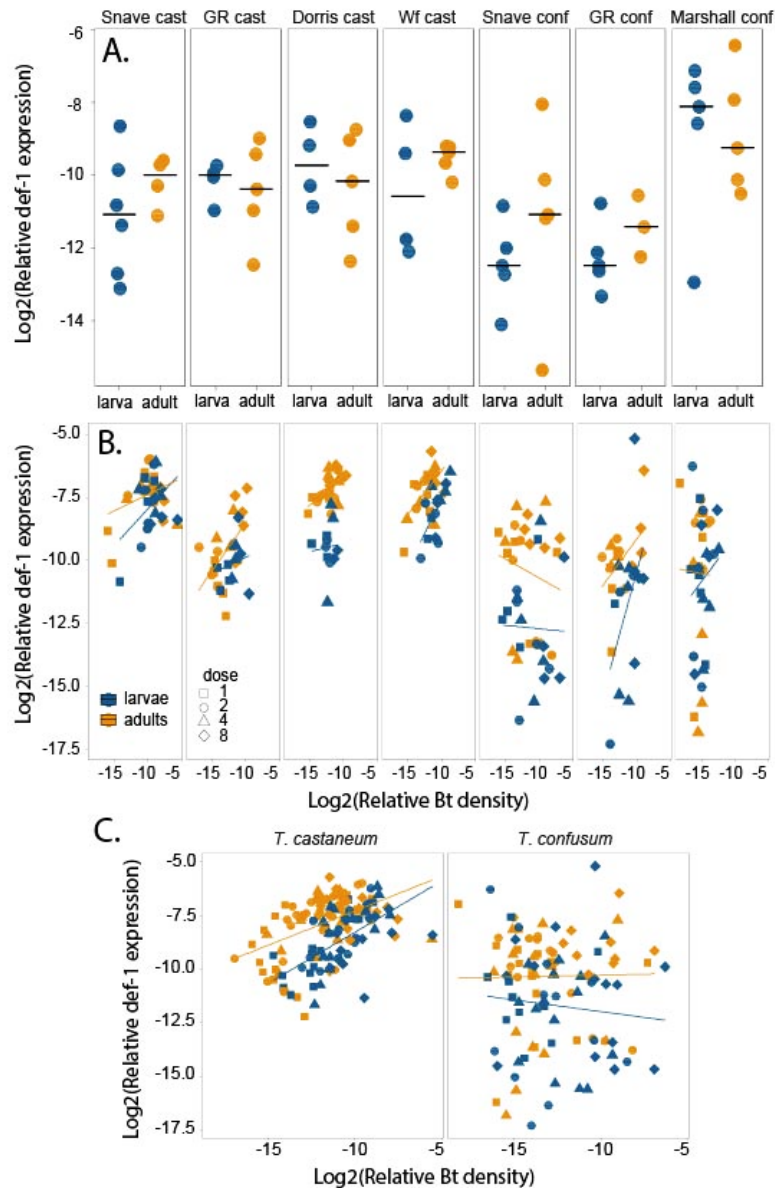

Source: http://biorxiv.org/content/10.1101/2021.02.24.432795v1.full.pdf
